# Supplementary material for: Two well-differentiated pancreatic neuroendocrine tumor mouse models
Source: PubMed Central journal article supplement (PMC7206057; doi:10.1038/s41418-019-0355-0), 2019-06-03

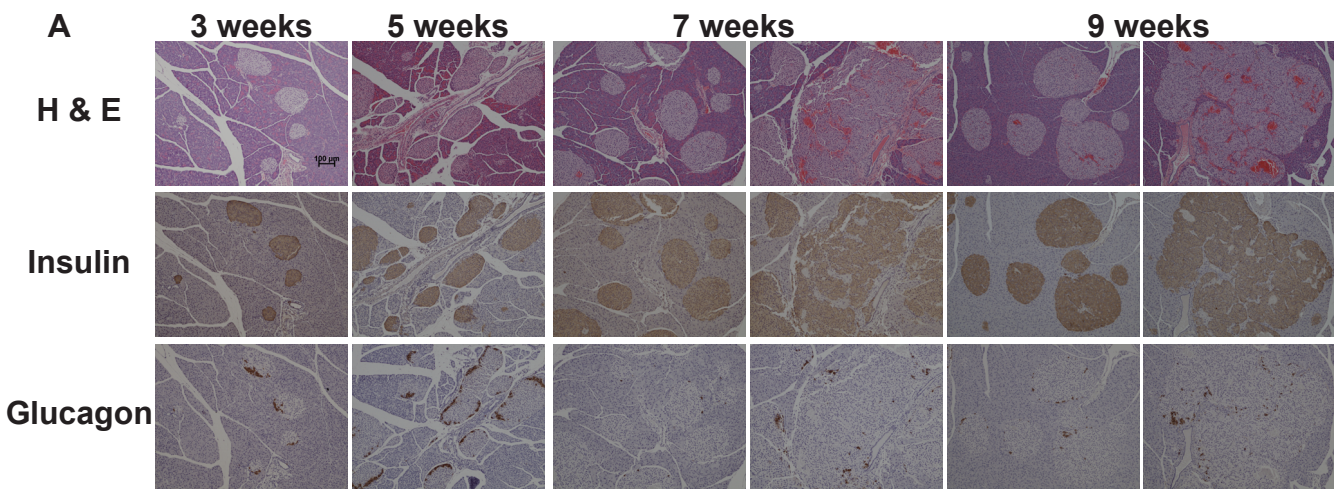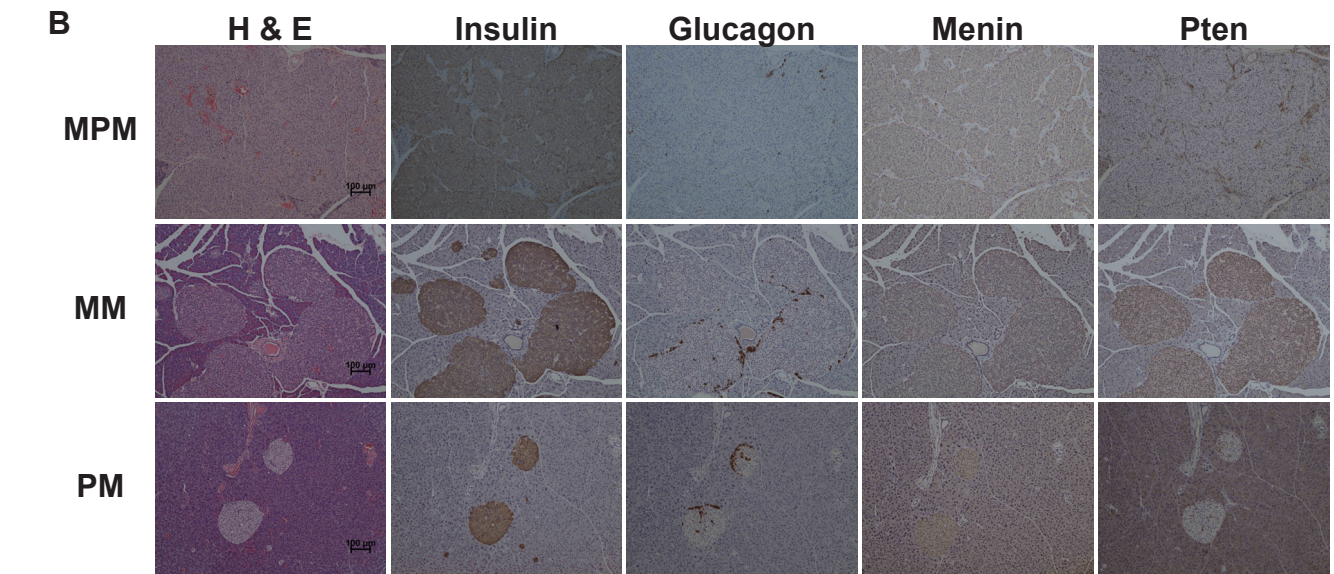

Supplement: 41418_2019_355_MOESM7_ESM.pdf [file 41418_2019_355_MOESM7_ESM.pdf]
